# Supplementary material for: Modulation of Acute Intestinal Inflammation by Dandelion Polysaccharides: An In-Depth Analysis of Antioxidative, Anti-Inflammatory Effects and Gut Microbiota Regulation
Source: MDPI journal article supplement (doi:10.3390/ijms25031429), 2024-01-24
Supplement: s1 [file s1]

**Supplementary Table S1.** Primer sequence list for qRT-PCR.

| Gene          | Forward primer (5'-3')        | Reverse primer (5'-3')       |
|---------------|-------------------------------|------------------------------|
| Claudin-1     | ACCCTGCCCCGTGACTTTG           | AGGAGTCGAAGACTTTGCACT        |
| ZO-1          | GATGAGCGGGCTACCTTA            | TGGAGACTGCGTGGAATG           |
| TNF- $\alpha$ | GGGTGTTTCATCCATTCTC           | GGAAAGCCCATTGAGT             |
| IL-22         | ATGAGTTTTTCCCTTATGGGGAC       | GCTGGAAGTTGGACACCTCAA        |
| IL-6          | GAAACCGCTATGAAGTTCCTCTCT<br>G | TGTTGGGAGTGGTATCCTCTGTG<br>A |
| IL-1 $\beta$  | GGCTGGACTGTTTCTAATGC          | ATGGTTTCTTGTGACCCTGA         |
| CAT           | GAGGCGGGAACCCAATAG            | GTGTGCCATCTCGTCAGTGAA        |
| Nrf2          | CTTTAGTCAGCGACAGAAGGAC        | AGGCATCTTGTTTGGGAATGTG       |
| HO-1          | GAACCCAGTCTATGCCCCAC          | GGCGTGCAAGGGATGATTC          |
| NQO1          | AGGATGGGAGGTACTCGAATC         | AGGATGGGAGGTACTCGAATC        |

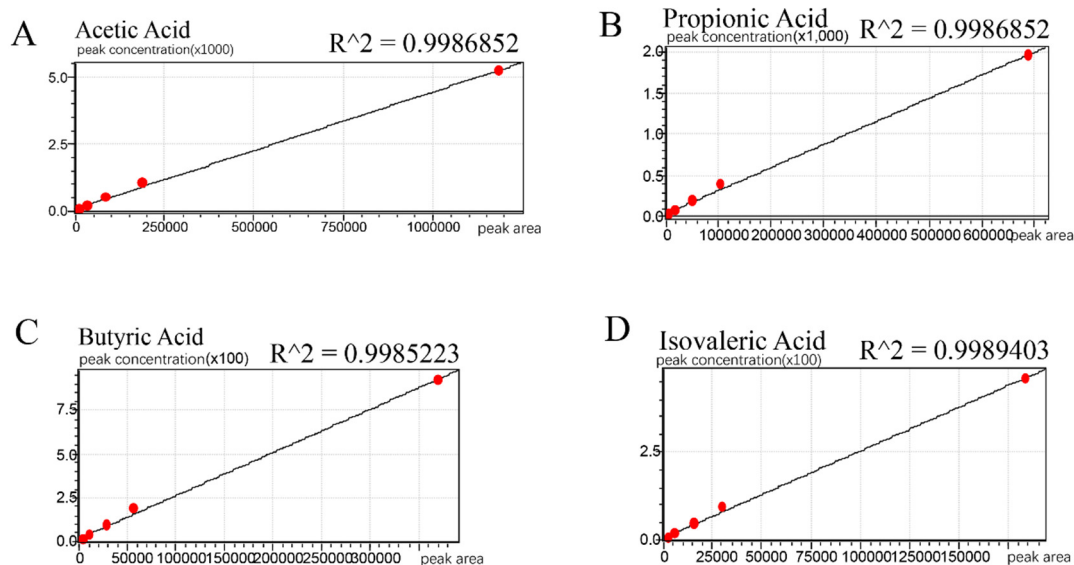

**Supplement Figure S1.** Peaks of chromatogram reported to standards of Acetic Acid (A), Propionic Acid (B), Butyric Acid (C) and Isovaleric Acid (D).  $R^2$  in turn 0.9986852, 0.9986852, 0.9985223 and 0.9989403.
